# Supplementary material
Source: Springer Nature journal article supplement (https://www.springermedizin.de/resource/supplementary/13054_2013_2191_MOESM7_ESM.pdf/9712638)

# Supplemental Fig. 5

## PD-1 in CD4<sup>+</sup>

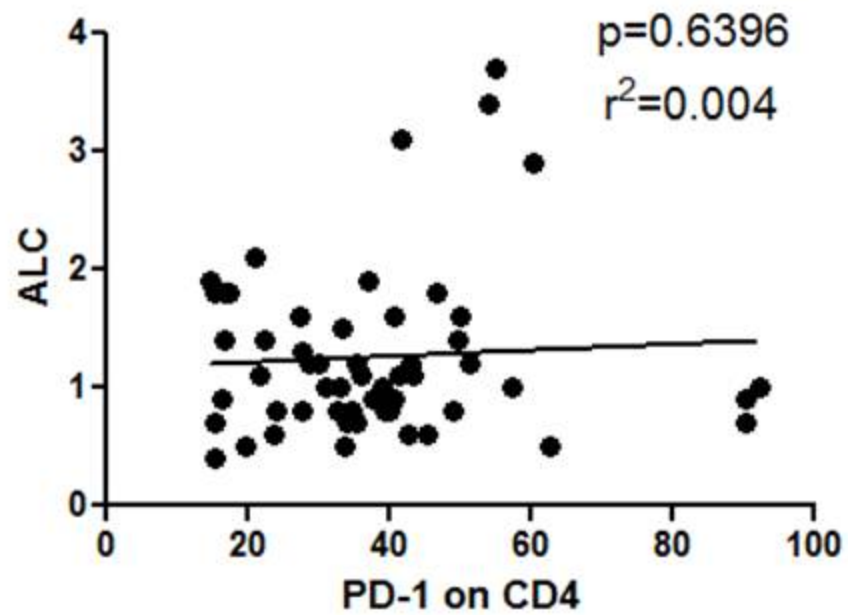

## PD-1 in CD8<sup>+</sup>

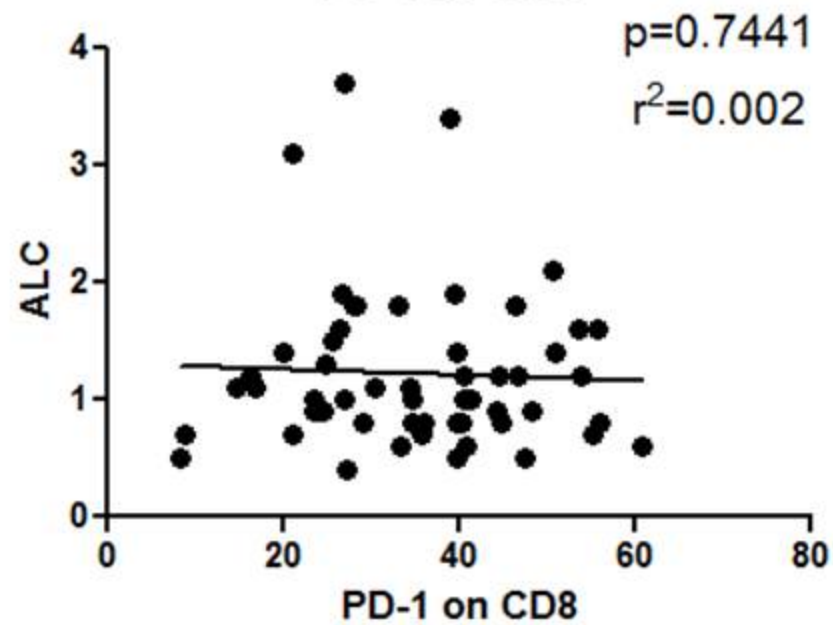

Supplement: MOESM7 [file 9712638]
